# Supplementary material for: The 40-Something randomized controlled trial to prevent weight gain in mid-age women
Source: PubMed Central journal article supplement (PMC4016250; doi:10.1186/1471-2458-13-1007), 2013-10-25

**Additional file 1**

**Goals for Weight according to BMI**

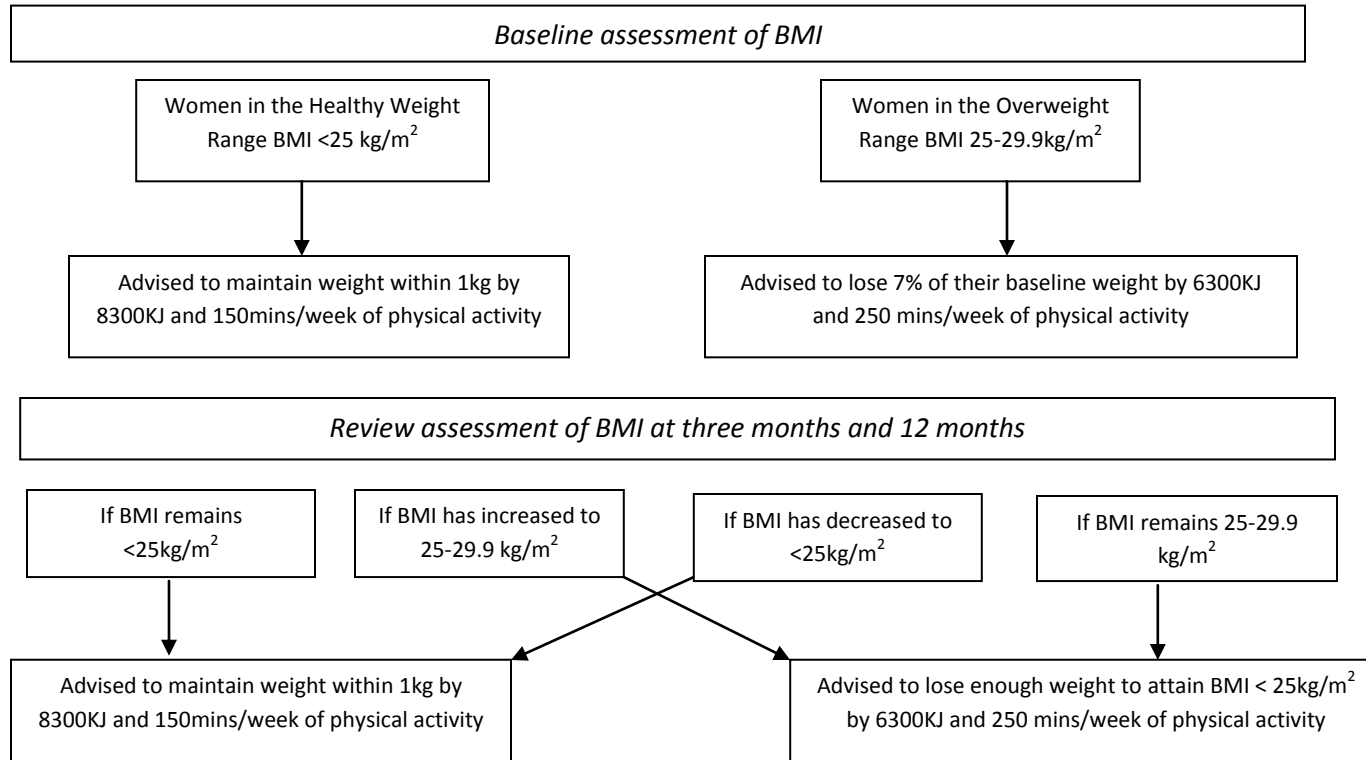

Supplement: 1471-2458-13-1007-S1.pdf [file 1471-2458-13-1007-S1.pdf]
