# Supplementary material for: The 40-Something randomized controlled trial to prevent weight gain in mid-age women
Source: PubMed Central journal article supplement (PMC4016250; doi:10.1186/1471-2458-13-1007), 2013-10-25
Supplement: 1471-2458-13-1007-S2.pdf [file 1471-2458-13-1007-S2.pdf]

## Additional File 2: Intervention components (Phase 1) of the 40-Something RCT

| <i>Component</i>                                                                                                                                                                                                             | <i>Rationale for inclusion</i>                                                                                                                                                                                            | <i>MI</i>                                                                                                                                                                                                            | <i>SDI</i>                                                                                                                                                      |
|------------------------------------------------------------------------------------------------------------------------------------------------------------------------------------------------------------------------------|---------------------------------------------------------------------------------------------------------------------------------------------------------------------------------------------------------------------------|----------------------------------------------------------------------------------------------------------------------------------------------------------------------------------------------------------------------|-----------------------------------------------------------------------------------------------------------------------------------------------------------------|
| Written feedback or measures of health status at baseline, 3 and 12 months (BP, anthropometry blood).                                                                                                                        | Basis of goal setting<br>Motivation for participants                                                                                                                                                                      | Provided as part of consultation with Dietitian at consultations 1 (baseline measures), 3 (compliance measures) and at 12 month measures appointment (provided in person except for blood results which were mailed) | Provided by mailout with a covering letter.<br>- Mailout 1 after baseline measures<br>- Mailout 2 after 3 month measures<br>- Mailout 3 after 12 month measures |
| Written feedback on dietary intake and physical activity at baseline, 3 and 12 months.                                                                                                                                       | Basis of recommendations for behaviour change<br>Motivation for participants.                                                                                                                                             | As above.                                                                                                                                                                                                            | As above.                                                                                                                                                       |
| Written weight goals and strategies to change diet and physical activity after baseline and 3 months measures.                                                                                                               | Clear goals and strategies.                                                                                                                                                                                               | Negotiated with participant by Dietitian as part of consultations.                                                                                                                                                   | Provided as part of mailouts 1 and 2.                                                                                                                           |
| 12 page weight control brochure for weight loss (if BMI 25-29.9) or prevent weight gain (if BMI 18.5-24.9). Diet and physical activity goals clearly stated. Weight loss: 6300kJ and 250 minutes physical activity per week. | Contained 10 weight control messages for participants to refer back to.<br>Detailed how to put dietary and physical activity change in to practice (e.g. daily meal plan, recipes, tips to increase incidental activity). | Handed to participants during consultation 1.                                                                                                                                                                        | Sent by post as part of mailout 1.                                                                                                                              |
| Self-monitoring tool: Weight tracking recording sheet, physical activity and diet dairy, given to all participants.                                                                                                          | Self-monitoring of weight and associated behaviours has been shown to improve compliance and weight change outcomes[50-52]                                                                                                | Materials given in consult 1. Progress with self-monitoring evaluated in consultations 3,4 and 5                                                                                                                     | Materials sent by post as part of mail out 1. Self-monitoring was encouraged in the Newsletter.                                                                 |
| Menstrual record sheet.                                                                                                                                                                                                      | Used to check menopause status                                                                                                                                                                                            | Handed to participants upon attending baseline and 12 month assessments                                                                                                                                              | Handed to participants at baseline and 12 month assessments                                                                                                     |

|                                                                                                                                                                                                                                                                    |                                                                                                                                                     |                                                                                                                                                                                                                     |                                                |
|--------------------------------------------------------------------------------------------------------------------------------------------------------------------------------------------------------------------------------------------------------------------|-----------------------------------------------------------------------------------------------------------------------------------------------------|---------------------------------------------------------------------------------------------------------------------------------------------------------------------------------------------------------------------|------------------------------------------------|
| 40-Something Newsletter<br>4xA4 sheets                                                                                                                                                                                                                             | Prevent attrition by promoting study involvement to participants, provide recipe ideas and encourage self-monitoring                                | Mailed to participants at 6 monthly intervals.                                                                                                                                                                      | Mailed to participants at 6 monthly intervals. |
| Consultation 1: with Accredited Practising Dietitian applying MI principles of discrepancy development to negotiate goals and 3 behaviour change strategies for dietary change based on analysis of 4 day record.                                                  | By establishing discrepancy between actual and desired behaviour in eating, specific goals and strategies are set by the participant.               | Aimed at guiding the participant to eat a high nutritional quality diet that met their relevant daily energy intake goal (8300kJ or 6300kJ) and nutrient requirements [30]; and adhered to the seven diet messages. | ×                                              |
| Consultation 2: with Exercise Physiologist applying MI principles to negotiate 3 strategies for physical activity based on 4 day record and after screening for prior injury.                                                                                      | By establishing discrepancy between actual and desired behaviour in physical activity, specific goals and strategies can be set by the participant. | Participants were encouraged to evaluate their compliance with the study's weight control messages around activity and inactivity.                                                                                  | ×                                              |
| Consultation 3: with Dietitian – 3 months. Compliance with weight goal and 3 dietary and 3 physical activity strategies and control messages were checked. Barriers to change and ways to overcome these barriers were discussed. Special topic: emotional eating. | Discrepancy focus was in resolving body dissatisfaction.                                                                                            | Feedback provided and goals and strategies revised where necessary.                                                                                                                                                 | ×                                              |
| Consultation 4: with Dietitian – 6 months. As for session 3 with special topic: understanding nutrition information panels.                                                                                                                                        |                                                                                                                                                     | Feedback provided and goals and strategies revised where necessary.                                                                                                                                                 | ×                                              |
| Consultation 5: with Dietitian – 9 months. As for session 3 plus special topic: staying motivated. Discrepancy focus: resolving body dissatisfaction.                                                                                                              | Need to maintain motivation during maintenance phase                                                                                                | Decisional balance activity.                                                                                                                                                                                        | ×                                              |
