# Supplementary material for: The 40-Something randomized controlled trial to prevent weight gain in mid-age women
Source: PubMed Central journal article supplement (PMC4016250; doi:10.1186/1471-2458-13-1007), 2013-10-25
Supplement: 1471-2458-13-1007-S3.pdf [file 1471-2458-13-1007-S3.pdf]

### Additional file 3 : Procedure for each data collection event

| <i>Station</i>                                                                                                                  | <i>Baseline</i> | <i>3 mo</i> | <i>12 mo</i> | <i>18 mo</i> | <i>24 mo</i> |
|---------------------------------------------------------------------------------------------------------------------------------|-----------------|-------------|--------------|--------------|--------------|
| 1. Greeting participants admitted and procedure explained.                                                                      | ✓               | ✓           | ✓            | ✓            | ✓            |
| Gave questionnaire to complete while moving around stations.                                                                    | ✓               |             | ✓            |              | ✓            |
| 2. Blood pressure measurement                                                                                                   | ✓               | ✓           | ✓            |              | ✓            |
| 3. Height                                                                                                                       | ✓               |             | ✓            |              | ✓            |
| 4. Weight                                                                                                                       | ✓               | ✓           | ✓            | ✓            | ✓            |
| 5. Body composition –                                                                                                           |                 |             |              |              |              |
| a. BIA                                                                                                                          | ✓               | ✓           | ✓            | ✓            | ✓            |
| b. Inbody Analyser*                                                                                                             |                 |             | ✓            | ✓            | ✓            |
| 6. Waist circumference                                                                                                          | ✓               | ✓           | ✓            | ✓            | ✓            |
| 7. Blood collection by trained phlebotomist                                                                                     | ✓               |             | ✓            |              |              |
| 8. Breakfast provided                                                                                                           | ✓               | ✓           | ✓            | ✓            | ✓            |
| Questionnaires completed                                                                                                        | ✓               |             | ✓            |              | ✓            |
| 9. Instructed in how to complete 4 day diet and physical activity diary and given scales and pedometer after checking equipment | ✓               | ✓           | ✓            |              |              |
| 10. Questionnaires checked for completeness.                                                                                    | ✓               |             | ✓            |              | ✓            |
| Explained next stage and discharged                                                                                             | ✓               | ✓           | ✓            | ✓            | ✓            |
